# Supplementary material for: Acute and chronic central nervous system oxidative stress/toxicity during hyperbaric oxygen treatment of subacute and chronic neurological conditions
Source: Frontiers journal article supplement (doi:10.3389/fneur.2024.1341562), 2024-03-04
Supplement: Table_1.pdf [file Table_1.pdf]

SUPPLEMENTARY TABLES S1-S5: Data Tables 1-5

Table 1. Acute Oxygen Toxicity (OT). Cases experiencing OT in  $\leq 5$  HBOTs. **BOLD:** cases treated at outside facilities. Subject # corresponds to subject #'s in Supplementary File S2. HBOT schedule: x ATA/y = pressure level in atmospheres absolute/minutes of total treatment time unless specifically designated. qd=once/day, bid=twice/day.

| Subject  | Age/Sex       | Diagnosis                                  | Time from injury to HBOT | HBOT Schedule                                                                                                            | Number of HBOTs at Symptom Onset | Signs/Symptoms of Ox Tox                                                                                      | Cumulative HBOT dose (ATA-hrs.) |
|----------|---------------|--------------------------------------------|--------------------------|--------------------------------------------------------------------------------------------------------------------------|----------------------------------|---------------------------------------------------------------------------------------------------------------|---------------------------------|
| <b>1</b> | 32,F          | Decompression Illness                      | 30d                      | "Standard Navy decompression tables," 2.0 ATA, 75% FiO <sub>2</sub> /120, qd x 3, 2.0 ATA, 75% FiO <sub>2</sub> /60 x 24 | 1                                | Nausea, vomiting, weakness, pallor, diaphoresis                                                               | 3.0                             |
| <b>2</b> | Young Child,M | Seizure Disorder                           | years                    | 1.75 ATA/60, bid, 5d/week                                                                                                | 5                                | Increased seizure frequency                                                                                   | 8.7                             |
| <b>3</b> | 2,M           | Drowning, spastic quad cerebral palsy (CP) | 5mos.                    | 1.75 ATA x 1, 2.4 ATA x 1, 1.75 ATA x 17, 2.0 ATA x 1, all 60 mins.                                                      | 2                                | Uncontrollable shaking arms, legs, chin, clonus in chamber                                                    | 4.1                             |
| <b>4</b> | 44,M          | Anoxic Brain Injury, seizures              | 4y                       | 1.5/45 x 1, 1.75/60 x 1 and 1.75/120 x 1 bid, 1.75/60 x 4 bid, 1.5/45 x 2, 1.5/60 x 1                                    | 2                                | Incoherent, couldn't eat after 2 HBOTS, "under the influence" after 3 <sup>rd</sup> HBOT, lost balance, gait, | 2.9                             |

|          |         |                                     |                |                                                                                                                                      |   |                                                                                                                                                                                                                                                                              |                  |
|----------|---------|-------------------------------------|----------------|--------------------------------------------------------------------------------------------------------------------------------------|---|------------------------------------------------------------------------------------------------------------------------------------------------------------------------------------------------------------------------------------------------------------------------------|------------------|
|          |         |                                     |                |                                                                                                                                      |   | swallow , and all neuro gains of 2 previous years after 7 <sup>th</sup> HBOT                                                                                                                                                                                                 |                  |
| <b>5</b> | 15,M    | Rasmussen's encephalitis (seizures) | 10y            | 1.7/90 x 18 bid, 1.5/60 x 5, qd, all 6d/week                                                                                         | 1 | Seizures 20 mins. into each HBOT, increasing seizure frequency with HBOT, status epilepticus, hemispherectomy                                                                                                                                                                | 0.43             |
| <b>6</b> | Adult M | Amyotrophic Lateral Sclerosis, TBI  | mos.           | 1.75/60 qd x 3, 2.0/60 x 1                                                                                                           | 4 | Deterioration with drooling, decreased speech                                                                                                                                                                                                                                | 7.25             |
| <b>7</b> | 95,M    | Stroke; stroke                      | 2wks; same day | (1.35 ATA/60, qd, 6d/wk., x 3000), 1.5/60, 4h Surface interval, 1.1/60 (abort at 20 minutes); next day 1.1/60 (abort at 20 minutes). | 2 | No signs/symptoms from 3000 HBOTs, Intense head pain and sensation of "head squeezed" followed by neurologic deterioration. Next day confusion, and somnolence, but conversant, grand mal seizure during HBOT that day. 15 more seizures until death the following afternoon | 4052; 1.7 (4054) |

Table 2. Chronic CNS Oxygen Toxicity (OT): Cases experiencing OT at 1.5 ATA oxygen. **BOLD:** cases treated at outside facilities. \* = cases treated at outside facility and by author. Subject # corresponds to subject #'s in Supplementary File S2. HBOT schedule: x ATA/y = pressure level in atmospheres absolute/minutes of total treatment time unless specifically designated. qd=once/day, bid=twice/day

| Subject | Age/Sex | Diagnosis                         | Time from injury to HBOT | HBOT Schedule                                                               | Number of HBOTs at Symptom Onset | # of consecutive HBOTs at Symptom Onset | Signs/Symptoms of Ox Tox                                                                                                                                                              | Cumulative HBOT dose (ATA-hrs.) |
|---------|---------|-----------------------------------|--------------------------|-----------------------------------------------------------------------------|----------------------------------|-----------------------------------------|---------------------------------------------------------------------------------------------------------------------------------------------------------------------------------------|---------------------------------|
| 8       | 46,M    | Cerebral DCI, dementia            | 7mos.                    | 2.0, 2.4, 1.5/90 qd x 31; 1.5/90, 1.5/60 bid and qd 1.5/60, 7d/wk. x 79     | 31;110                           | 31;79                                   | Dizziness, restlessness, agitation; dizziness, restlessness, agitation, extreme anxiety in chamber                                                                                    | 91;215                          |
| 9       | 4,M     | Cerebral palsy                    | 4y                       | 1.5/90 qd-bid, 5d/wk x 103, 1.5/90 qd-bid, 5d/wk x 91                       | 185                              | 82                                      | Regression: decreased tone and fine motor, tremor, startle, hyperactivity, drooling                                                                                                   | 416                             |
| 10      | 19,M    | Ischemic/hypoxic, sepsis          | 3.8y                     | 1.5/60 bid x 40, x 40, 1.5/90 qd x 40, x 40 ; 1.5/90 qd x 15; 1.5/60 qd x 6 | 135;164;181                      | 15;4;6                                  | behavioral deterioration, offensive, hyperactive, rambunctious, aggressive; behavioral deterioration, hyperactive, demanding; fidgety, hyperactive, short-tempered                    | 244;309;349                     |
| 11      | 46,M    | Carbon Monoxide                   | 6mos.                    | 1.5/90 x 40, 1.5/90 x 30, qd, 6d/wk                                         | 65-70                            | 25-30                                   | Dizziness, dysphoria, visual symptoms, nausea                                                                                                                                         | 146                             |
| 12      | 50,M    | Carbon Monoxide                   | 6mos.                    | 1.5/90 x 40, 1.5/90 x 30, qd, 6d/wk                                         | 65-70                            | 25-30                                   | Dizziness, dysphoria, visual symptoms, nausea                                                                                                                                         | 146                             |
| 13      | 33,M    | Carbon Monoxide                   | 6mos.                    | 1.5/90 x 40, 1.5/90 x 30, qd, 6d/wk                                         | 65-70                            | 25-30                                   | Dizziness, dysphoria, visual symptoms, nausea                                                                                                                                         | 146                             |
| 14      | 52,M    | Carbon Monoxide                   | 2.5y                     | 1.5/90, bid, 6d/wk x 40, then x 33, 1.5/60 bid x 2                          | 75                               | 2                                       | Internal jitteriness/"racing", anxiety, "nervousness" in chamber                                                                                                                      | 167                             |
| 15      | 60,M    | Stroke; TBI with brain hemorrhage | 2.5y;3 mos.              | 1.5/90, qd-bid, 5d/wk x 40, 1.5/90, qd-bid, 5d/wk x 35                      | 75                               | 35                                      | increase in activity/energy level, compulsive reading, decreased sleep, euphoria, irritability, short-temper, anger, arguing, aggression, agitation, and irrational thinking/behavior | 169                             |

|     |            |                                                   |                |                                                                                                                |                          |                       |                                                                                                                                                                                                                                                 |                           |
|-----|------------|---------------------------------------------------|----------------|----------------------------------------------------------------------------------------------------------------|--------------------------|-----------------------|-------------------------------------------------------------------------------------------------------------------------------------------------------------------------------------------------------------------------------------------------|---------------------------|
| 16  | 33,M       | Severe TBI                                        | 3y             | 1.5/60, qd, 5d/wk x 110                                                                                        | 110                      | 30                    | Agitation, aggression, bizarre, and uncontrollable behavior                                                                                                                                                                                     | 165                       |
| 17* | 4,M        | Drowning                                          | 1y3m os.       | 1.5/90, bid, 5d/wk x 80; 1.5/60 bid x 34; 1.5/60 bid x 31; 1.5/60 bid x 35; 1.5/60 bid x 10                    | 20-25; 112;14 4;177; 190 | 20-25; 32; 30; 32; 10 | Frequent myoclonus and fatigue; same; same; same plus seizure; extreme irritability, verbal outbursts, aggression                                                                                                                               | 45; 228; 276; 326; 346    |
| 18  | 19,M       | Drowning                                          | 7wks; 1y7m os. | 2.0/90 x 30 bid, 1.5-2.0/30-60 x 190 bid, 1.5/90 qd x >281                                                     | 276; > 501               | 56; >224              | Boundless energy; Increasing uncontrollable behavior: aggression, anger, and irrational thinking, requiring institutionalization                                                                                                                | 465; 971                  |
| 19  | 1y6m os.,F | Quad CP, seizures                                 | 1y6m os.       | 1.5/60 x40, bid, 1.5/60 qd-bid x 37, 1.5/60 qd x 13,11,12,13,6; same x 7, same x 1; 1.25/60 qd x 6             | 132;14 0;146             | 6;1;6                 | Became “wild” with extreme exacerbation of tone, extensor posturing, and decreased appetite; hyperactivity, increased tone, sleep disruption; twitching in chamber; “wired,” hyperactive, increased tone, decreased sleep; twitching in chamber | 197; 210; 217             |
| 20  | 3,F        | Athetoid CP                                       | 3y             | 1.5/60 x 42, x 38, x 12, 10, 10, 10, 10, 3, all bid                                                            | 135                      | 3                     | Jittery/tremulous in chamber                                                                                                                                                                                                                    | 203                       |
| 21  | 10,F       | Quad CP                                           | 10y            | 1.5/60 x 40, x 25, all bid                                                                                     | 65                       | 65                    | Lethargy, startling to loud noises, and began biting individuals. Diffuse hyperreflexia and clonus on exam.                                                                                                                                     | 97                        |
| 22* | 3,M        | Spastic diplegic CP, subcortical seizure disorder | 3y             | 1.5/60 x 37; 1.5/60 qd-bid x 42; 1.75/? x 1; 1.3/55 qd x 8                                                     | 36; 80; 88               | 36; 1; 8              | Increased myoclonus frequency; Grand mal seizure in chamber; Complex partial seizure in chamber                                                                                                                                                 | 54; 120; 129              |
| 23  | 8,F        | Severe TBI, persistent vegetative state           | 3y, 2mos.      | 1.5(?)/60(?) x 75, bid; 1.5(?)/60(?) x 30, bid; 1.5/? x 15, qd, 1.5 then 1.3/60(?) qd, x 5-15 (?) q 2-3 months | 40; 105; At least 120    | 40; 30; >15           | Increasing irritation; increasing agitation/irritation; return of seizures, status epilepticus, cardiac arrest, death                                                                                                                           | Estimate d 60; 158; >18 0 |

|    |            |                                                       |                  |                                                                         |             |             |                                                                                                                |                        |
|----|------------|-------------------------------------------------------|------------------|-------------------------------------------------------------------------|-------------|-------------|----------------------------------------------------------------------------------------------------------------|------------------------|
| 24 | 9,M        | Autism                                                | 7y               | 1.5/60 x 40 qd, 1.5/60 x 25                                             | 61          | 21          | Mood swings, speech, agitation, hyperactivity, recurrent autistic obsessions/behaviors                         | 91                     |
| 25 | Elderly,M  | Creutzfeldt Jakob Disease                             | Unkn.            | 1.5/unknown, qd-bid, (estimated at least standard 60 minute treatments) | At least 10 | At least 10 | Increased restlessness, spasticity, aggressiveness, incontinence                                               | Estimated at $\geq 15$ |
| 26 | 2y11 mos,F | Birth injury, Seizure at birth, Developmental Delays, | 2y, 6mos.        | 1.5/60 x17, 1.5/60 at depth x 15                                        | 32          | 15          | Jerkiness (in chamber), complex partial seizure during 32 <sup>nd</sup> HBOT                                   | 48                     |
| 27 | 7 mos., F  | Herpes meningitis, encephalitis                       | 1 mo.            | 1.15/45, qd, x 11, 1.5/90 bid at depth qd x 5                           | 13; 15; 16  | 13; 2; 1    | Seizure at depth 13 <sup>th</sup> , 15 <sup>th</sup> , and 16 <sup>th</sup> HBOT                               | 12.5; 15.5; 16.3       |
| 28 | 50,F       | TBI, PPCS                                             | 16mos.           | 1.5/60 x 39, qd, 5d/wk                                                  | 39          | 39          | Fatigue with associated confusion                                                                              | 59                     |
| 29 | 49,F       | TBI, PPCS                                             | 8y               | 1.5/60 x 30 qd, 5d/wk                                                   | 22          | 22          | Euphoria followed by extreme fatigue, cognitive reversal and paresthesias with additional treatments           | 33                     |
| 30 | 45,F       | TBI, PPCS                                             | 3.5y             | 1.5/60 x 37, 5d/wk                                                      | 36          | 36          | Fatigue by 32 <sup>nd</sup> HBOT, confused and unable to converse by 36 <sup>th</sup> HBOT                     | 54                     |
| 31 | 48,F       | TBI, PCCS                                             | 22mos.           | 1.5/60 x 37, 5d/wk                                                      | 37          | 37          | Increasing fatigue                                                                                             | 55                     |
| 32 | 38,M       | TBI, PPCS                                             | 1y               | 1.5/60 x 34 qd, 5d/wk                                                   | 29          | 29          | Twitching, sleep disruption, dizziness, fatigue, weakness, shakiness, blurry vision, nausea, flu-like symptoms | 43                     |
| 33 | 45,M       | TBI x 3, PPCS                                         | 12y; 8y; 10 mos. | 1.5/60 x 40 qd, 5d/wk                                                   | 38          | 38          | Increasing fatigue, "foggy-headedness"                                                                         | 57                     |

|           |           |                                      |                 |                                                                            |       |       |                                                                                                                                                                         |                                                   |
|-----------|-----------|--------------------------------------|-----------------|----------------------------------------------------------------------------|-------|-------|-------------------------------------------------------------------------------------------------------------------------------------------------------------------------|---------------------------------------------------|
| <b>34</b> | 3F,       | CP, spastic diplegia                 | 3y              | 1.5/60 x 40 bid                                                            | 21    | 21    | Decreased spasticity, then progressive regression to ~baseline tone (HBOT 20-40)                                                                                        | 31                                                |
| <b>35</b> | 15,M      | Birth injury, ADHD, autism, TBI/PPCS | 8 mos. post TBI | 1.3/90 x2, 1.5/90 x25, 1.3-1.75 (average 1.5)/90 x 29; 1.5/45 x 9          | 47;63 | 20; 9 | Increasing fatigue, agitation, frustration, HA in chamber, dizziness on chamber exit, difficulty processing information, absent-mindedness, "I don't feel like myself;" | Estimate d 105; 135, both based on average 1.5/60 |
| <b>36</b> | 51,F      | COVID Long-Hauler's Syndrome         | 6 mos; 2y       | 3 HBOT (unknown dose); 1.3/60 x 1, 1.5/60 x 8 qd                           | 12    | 9     | Extreme light-headedness, tachycardia, diaphoresis, near LOC, feeling of doom, "felt like going to die"                                                                 | > 13                                              |
| 37        | 52,M      | DCS Type II, brain & spinal cord     | 3y, 7 mos.      | USN6AModified x 1, USN6 x 14, USN5 x 1, 3.5 years earlier, 1.5/90 bid x 72 | 62    | 62    | Increasing paresthesias, dysesthesias in perineum, lower extremities, worsened autonomic symptoms                                                                       | 139                                               |
| <b>38</b> | Elderly,M | Stroke                               | 2y              | 1.6 (94% O2)/67.5 (from depth to surface) x 18, qd, 5d/wk                  | 11    | 11    | Aggressive, hyperactive; by 18 <sup>th</sup> unable to sleep, very agitated, global deterioration on repeat qEEG                                                        | 19                                                |

Table 3: Chronic CNS Oxygen Toxicity (OT): cases experiencing OT at > 1.5 ATA oxygen. **BOLD:** cases treated at outside facilities. Subject # corresponds to subject #'s in Supplementary File S2. HBOT schedule: x ATA/y = pressure level in atmospheres absolute/minutes of total treatment time unless specifically designated. qd=once/day, bid=twice/day.

| Subject | Age/Sex | Diagnosis | Time from injury | HBOT Schedule | Number of HBOTs at | # of consecutive HBOTs | Signs/Symptoms of Ox Tox | Cumulative HBOT dose |
|---------|---------|-----------|------------------|---------------|--------------------|------------------------|--------------------------|----------------------|
|---------|---------|-----------|------------------|---------------|--------------------|------------------------|--------------------------|----------------------|

|           |      |                                     | to<br>HBOT |                                                                                                                                                                 | Symp-<br>tom<br>Onset | at Symp-<br>tom<br>Onset |                                                                                                                                                                                                                                                                                                                                              | (ATA-<br>hrs.)        |
|-----------|------|-------------------------------------|------------|-----------------------------------------------------------------------------------------------------------------------------------------------------------------|-----------------------|--------------------------|----------------------------------------------------------------------------------------------------------------------------------------------------------------------------------------------------------------------------------------------------------------------------------------------------------------------------------------------|-----------------------|
| <b>39</b> | 58,M | Stroke/cerebral aneurysm rupture    | 3y         | 1.75 ATA x 3, 2.0 ATA x 5, 2.5 ATA x 11, 2.8 ATA x 1, 2.5 ATA x 5, all 60 mins., bid, 7d/wk; 1.75/60, bid, 7d/wk x 35                                           | 20; 60                | 20;35                    | Wild, combative, confused, incoherent; aggressive, angry, fatigued/lethargic                                                                                                                                                                                                                                                                 | 46; 119               |
| <b>40</b> | 21,M | Severe TBI, brain abscess, seizures | 7.7y       | 1.5/60 x 8, 1.75/60 x 31, bid, 6d/week                                                                                                                          | 18                    | 18                       | Lost balance, gait, irritability, impulsivity, anger, aggression. Agitation in chamber                                                                                                                                                                                                                                                       | 29                    |
| <b>41</b> | 33,M | Cerebral DCI                        | 1mo.       | USN6Mono x 3, 1.5/90 x 40, bid, 1.75/90 x 40 bid, all 80 7d/wk; 2.0/90 bid-tid x 15                                                                             | 83; 98                | 80; 15                   | Mildly irrational, hyperactive and euphoric; dysphoria, dizziness, tremor in chamber                                                                                                                                                                                                                                                         | 211; 256              |
| <b>42</b> | 9,F  | Drowning                            | 5y         | 1.5/60 x 51, bid, 5d/wk, 1.5/60, qd, 6d/wk x 29, 2.0/120 x 19, qd; 1.5/60 qd x 25, 1.5/90 bid, 6d/wk x 24                                                       | 99; 126               | 99; 27                   | Seized at depth; increasing fatigue, anxiety, hyperactivity. Also, discomfort in chamber.                                                                                                                                                                                                                                                    | 196; 238              |
| <b>43</b> | 4,M  | Diplegic CP                         | 4y         | 1.75 (95%)/60 x 22, 1.75 (100%)/60 x 56, all at 11 HBOTs/wk                                                                                                     | 78                    | 56                       | Seized at depth                                                                                                                                                                                                                                                                                                                              | 135                   |
| <b>44</b> | 12,M | Quad CP                             | 12y        | 1.75/60 x 40, 1.75/60 x 10, 1.75/60 x 20, 1.75/60 x 20, 1.75/60 x 15; 1.75/60 x 10; 1.75/60 x 50; 1.75/60 x 50; 1.5/60 x 30, 1.5/60 x 18. All HBOTs bid, 5d/wk. | 105;115;165; 215;263  | 15;10;50 ;50;18          | Speechlessness, decreased attention, cognition, balance, coordination, pallor, increasing lethargy, and was "rubbery legged, droopy and drunk", falling, and became wheelchair dependent; same recurrent symptoms; fatigue/lethargy; hyperactivity, decreased sleep, "wired;" lower extremity muscle spasms, clonus in multiple extremities. | 184;201; 289;377; 449 |

|    |      |                                                   |         |                                                                                                                                  |      |      |                                                                                                                                                                                                                                                                                                                                |                                         |
|----|------|---------------------------------------------------|---------|----------------------------------------------------------------------------------------------------------------------------------|------|------|--------------------------------------------------------------------------------------------------------------------------------------------------------------------------------------------------------------------------------------------------------------------------------------------------------------------------------|-----------------------------------------|
| 45 | 2,M  | Shaken baby, myoclonic seizures                   | 22mo s. | 1.75/60 x 38 bid; 1.75/60 x 40, bid                                                                                              | 78   | 40   | Increased myoclonic seizure frequency above baseline (>50/d)                                                                                                                                                                                                                                                                   | 137                                     |
| 46 | 2,M  | Hypoxic ischemic encephalopathy, seizure disorder | 2y      | 1.25-1.75/60 x 94, bid, 6d/wk.                                                                                                   | 94   | 94   | Increased seizure severity necessitating hospital admission for evaluation and control                                                                                                                                                                                                                                         | 141 (calculated at average 1.5 ATA)     |
| 47 | 14,M | Juvenile dermatomyositis                          | 2y8mos  | 1.55/60 x9, qd, at altitude                                                                                                      | 9    | 9    | Increased irritability and anxiety                                                                                                                                                                                                                                                                                             | 14                                      |
| 48 | 39,M | Acoustic trauma, tinnitus                         | 17 days | 2.0/60 x 4 bid, 2.5/60 x 2 bid, 2.0/60 x 4 bid                                                                                   | 9    | 9    | Tinnitus worse in injured ear, new tinnitus opposite ear with high frequency hearing loss. Four weeks post, tinnitus same or worse both ears.                                                                                                                                                                                  | 19                                      |
| 49 | 12,F | Severe TBI                                        | 6.5y    | 1.68-1.82/at least 60 mins., qd, 5d/week                                                                                         | 420  | 420  | Initial neurological improvement, but then developed grand mal seizures which progressively worsened months before death, presumptively from seizures.                                                                                                                                                                         | 735 (calculated at 1.75 ATA/60 average) |
| 50 | 24,F | Type II decompression illness                     | 8d      | USN6 x 1, USN5 x 2, qd, USN9 x 2, bid, 2.0/60 x 3, qd, 2.2/90 bid, 6d/wk. x 71/2 months, 30 min. surface interval between HBOTs. | 6;55 | 6;46 | Increase in dizziness, light-headedness, migratory paresthesias and pain, decreased balance, decreased vision, and severe headache; total body "buzzing"/paresthesias in chamber and between HBOTs. During 81 <sup>st</sup> HBOT severe headache, abnormal sensation in head, aborted treatment, cognitive worsening, fatigue. | 27;185                                  |



Table 4: Chronic CNS Oxygen Toxicity (OT): cases experiencing OT at < 1.5 ATA oxygen. **BOLD:** cases treated at outside facilities. Subject # corresponds to subject #'s in Supplementary File S2. HBOT schedule: x ATA/y = pressure level in atmospheres absolute/minutes of total treatment time unless specifically designated. qd=once/day, bid=twice/day. NBO = normobaric oxygen.

| Subject   | Age/Sex | Diagnosis                                                    | Time from injury to HBOT | HBOT Schedule                                                                                                                                                                                                     | Number of HBOTs/HBAs at Symptom Onset | # of consecutive HBOTs at Symptom Onset | Signs/Symptoms of Ox Tox                                                                                                                                                                                    | Cumulative HBOT dose (ATA-hrs.) |
|-----------|---------|--------------------------------------------------------------|--------------------------|-------------------------------------------------------------------------------------------------------------------------------------------------------------------------------------------------------------------|---------------------------------------|-----------------------------------------|-------------------------------------------------------------------------------------------------------------------------------------------------------------------------------------------------------------|---------------------------------|
| <b>51</b> | 10M     | Autism spectrum with verbal and basic social skills deficits | 8y                       | 1.3air/60 x 60, qd; 1.3air/60 x 2, 1.5air/60 x 7, qd                                                                                                                                                              | 69                                    | 9                                       | New onset tics (wrist and legs), head shaking immediately after 9 <sup>th</sup> HBA                                                                                                                         | 19                              |
| <b>52</b> | 38F     | TBI                                                          | 11 mos.                  | 1.5/60-90 x 20, 1.5-2.0/90 bid x 10 and qd x 3, 2.0/60-90 x 3, 1.3/90 x15, bid 10L(95% O <sub>2</sub> ) venti-mask, 1.3/2-3 hrs x 15 qd, 10L(95% O <sub>2</sub> ) venti-mask; repeat identical last dose x 8 (see | 61;<br>67                             | 10;<br>1                                | Loss of initial improvement with return of severe migraines and worsened TBI symptoms, head pressure/burning in the chamber; worsening of all symptoms and decreased vision and increased sound sensitivity | 135;<br>154                     |

|    |     |                                      |         |                                                                                                                                                                                                                         |                        |                        |                                                                                                                                                                       |               |
|----|-----|--------------------------------------|---------|-------------------------------------------------------------------------------------------------------------------------------------------------------------------------------------------------------------------------|------------------------|------------------------|-----------------------------------------------------------------------------------------------------------------------------------------------------------------------|---------------|
|    |     |                                      |         | history for additional details and more toxicity)                                                                                                                                                                       |                        |                        |                                                                                                                                                                       |               |
| 53 | 18F | TBI                                  | 4 mos.  | 1.5 x1, 1.7/90-120, 24.5% O <sub>2</sub> , qd x 11, 1.3/60 then 1.3/90-120, bid, 7d/wk x 35, 95% O <sub>2</sub> , 1.3/120-180, bid, 7d/wk., 95% O <sub>2</sub> x 26; 1.3/60 95% O <sub>2</sub> x 3; 1.3 air/45 qd x 38. | 59; 76; 114            | 12; 3; 38              | Worsening of PPCS symptoms: headache, fatigue, sleepiness, nausea, cognitive symptoms; increased fatigue and sleepiness; exhaustion and exacerbation of PPCS symptoms | 122; 169; 175 |
| 54 | 66M | cognitive decline, anxiety           | 5 years | 1.4/60 x 205; 1.3/50 x 106, 95% O <sub>2</sub> NRBM; NBO 10L (95% O <sub>2</sub> ) NRBM for 45 min x 2.                                                                                                                 | 311/12 years + NBO x 2 | 311/12 years + NBO x 2 | Blurry vision, brain fog, decreased concentration                                                                                                                     | 397           |
| 55 | 13F | Viral encephalitis, seizure disorder | 15 mos. | 1.2/60 x 35 bid; 1.1/60 x 6 qod, 1.1/60 x 37 qd                                                                                                                                                                         | 33; 64                 | 33; 23                 | Initial improvement then increase in aggression, violence, and loss of other gains; Increased seizure frequency, agitation, aggression,                               | 40; 74        |

|    |      |                                  |         |                                                                                                                                                                                 |                         |                     |                                                                                                                                                                                                                                                                                                                                                         |                       |
|----|------|----------------------------------|---------|---------------------------------------------------------------------------------------------------------------------------------------------------------------------------------|-------------------------|---------------------|---------------------------------------------------------------------------------------------------------------------------------------------------------------------------------------------------------------------------------------------------------------------------------------------------------------------------------------------------------|-----------------------|
|    |      |                                  |         |                                                                                                                                                                                 |                         |                     | decreased sleep,<br>regression of gains                                                                                                                                                                                                                                                                                                                 |                       |
| 56 | 25M  | TBI, SDH, SAH                    | 16 mos. | 1.4/50 x 39 qd,<br>1.4/50 x 17;<br>1.15/45 x 18;<br>1.3 air/90 x 24,<br>qd, 8.5y break,<br>1.15/45 x 1;<br>1.3/45 air x 7                                                       | 56; 69; 99              | 17; 13; 1           | Behavior regression<br>with increased<br>agitation, confusion,<br>cognitive decline,<br>elopement,<br>slamming doors;<br>increased agitation<br>in chamber, rubbing<br>head vigorously,<br>yelling, disrupted<br>sleep, loud voice,<br>vigorous skin<br>rubbing, bouncing<br>legs; agitation in<br>chamber, grimacing,<br>baring teeth,<br>rubbing head | 65; 76;<br>91         |
| 57 | 2.5M | Post-drowning,<br>cardiac arrest | 3 mos.  | Intermittent<br>NBO 2L O2<br>nasal<br>cannula/45min<br>bid x 8, HBA:<br>1.3/45 x 20 qd,<br>HBOT: 1.15/45<br>x7 qd; HBA<br>1.3/45 x2; HBA<br>1.15/45 x 1;<br>HBA 1.15/50 x<br>12 | NBO + 27;<br>29; 30; 32 | NBO +27;<br>2; 1; 2 | Diaphoresis,<br>increased arching<br>with myoclonus by<br>7 <sup>th</sup> O <sub>2</sub> treatment,<br>agitation, unable to<br>sleep for 48 hrs;<br>increased<br>neurostorming, no<br>sleep x 72h;<br>neurostorming,<br>spasms,<br>opisthotonos;                                                                                                        | 12; 12.4;<br>12.6; 13 |

|    |     |                                                                                                        |                  |                                                                        |     |     |                                                                               |     |
|----|-----|--------------------------------------------------------------------------------------------------------|------------------|------------------------------------------------------------------------|-----|-----|-------------------------------------------------------------------------------|-----|
|    |     |                                                                                                        |                  |                                                                        |     |     | agitation, inability to sleep, tachycardia to 170-180s, prolonged wakefulness |     |
| 58 | 22F | Lyme, Auto-Immune Encephalopathy/Meningitis, Herpes Encephalitis (HE), Electrographic seizure disorder | 2.5 mos. post HE | 1.15/45 x 40; 15 mos. later: 1.15/45 x 1                               | 41  | 1   | Lip twitching, jaw spasm/trismus, gross arm tremor 10 mins. into treatment    | 35  |
| 59 | 83F | Stroke, persistent dizziness and short-term memory loss                                                | 11y              | 1.5/60 x 21, 1.3(95% O2)/60 x 229 qd 10 liters/min non-rebreather mask | 156 | 135 | Increased agitation, irritability, paranoia, combativeness, and anger         | 198 |

Table 5. Single case of Withdrawal Syndrome. **BOLD:** case treated at outside facility. Subject # corresponds to subject #'s in Supplementary File S2. HBOT schedule: x ATA/y = pressure level in atmospheres absolute/minutes of total treatment time unless specifically designated. qd=once/day, bid=twice/day.

| Subject | Age/Sex | Diagnosis | Time from injury to HBOT | HBOT Schedule | Number of HBOTs at Symp- | # of consecutive HBOTs at Symp- | Signs/Symptoms of Ox Tox | Cumulative HBOT dose |
|---------|---------|-----------|--------------------------|---------------|--------------------------|---------------------------------|--------------------------|----------------------|
|---------|---------|-----------|--------------------------|---------------|--------------------------|---------------------------------|--------------------------|----------------------|

|           |                      |          |       |                                                                                | tom<br>Onset | tom<br>Onset |                                                                                                                                                                                                                                                                                                                                                                                                                                                              | (ATA-<br>hrs.) |
|-----------|----------------------|----------|-------|--------------------------------------------------------------------------------|--------------|--------------|--------------------------------------------------------------------------------------------------------------------------------------------------------------------------------------------------------------------------------------------------------------------------------------------------------------------------------------------------------------------------------------------------------------------------------------------------------------|----------------|
| <b>60</b> | Young<br>child,<br>F | Dystonia | Years | 1.75/60, bid, x<br>40; 1.75/60,<br>bid, x 20;<br>1.75/60, bid,<br>7d/wk., x 90 | 150          | 90           | Marked improvement in dystonia during each block of treatment, complete regression over 1 month break between blocks. By end of 3 <sup>rd</sup> block of HBOT: "Very energetic, active, healthy, and relaxed with improvement in dystonia again." After 2 week break reversal, extreme rigidity, twisted, "her legs are turning, her pelvis is deviated, her left hip....she in not eating well, constant total body involuntary movements, teeth-grinding." | 263            |
